# Supplementary material for: Comparison of post-operative pain and quality of life between uniportal subxiphoid and intercostal video-assisted thoracoscopic lobectomy
Source: PubMed Central journal article supplement — J Thorac Dis. 2020 Jul;12(7):3582–90. doi: 10.21037/jtd-20-425 (PMC7399408; doi:10.21037/jtd-20-425), 2020-07
Supplement: jtd-12-07-3582-dss.pdf [file jtd-12-07-3582-dss.pdf]

## Data Sharing Statement

|                     |                                                                                                                                                    |                                                                                                                           |
|---------------------|----------------------------------------------------------------------------------------------------------------------------------------------------|---------------------------------------------------------------------------------------------------------------------------|
| <b>Article Info</b> | Article information: <a href="http://dx.doi.org/10.21037/jtd-20-425">http://dx.doi.org/10.21037/jtd-20-425</a> .                                   |                                                                                                                           |
| <b>Item</b>         | <b>Question</b>                                                                                                                                    | <b>Authors' Response<br/>(place "-" if not applicable)</b>                                                                |
| 1                   | Would you like to share data collected for your study to others?                                                                                   | Yes                                                                                                                       |
| 2                   | If not, would you like to share the reason for your decision?                                                                                      | -                                                                                                                         |
| 3                   | What data in particular will be shared?                                                                                                            | We would be happy to share our anonymized data                                                                            |
| 4                   | Any other documents will be share? Such as study protocol, statistical analysis plan, informed consent form, clinical study report, analytic code. | Statistical analysis plan                                                                                                 |
| 5                   | When will data availability begin?                                                                                                                 | From publication data                                                                                                     |
| 6                   | When will data availability end?                                                                                                                   | Two years within the publication date, since the technique or survival date may be updated over time.                     |
| 7                   | To whom will you share the data?                                                                                                                   | Researchers with interest in subxiphoid VATS                                                                              |
| 8                   | For what type of analysis or purpose?                                                                                                              | Interest in similar study                                                                                                 |
| 9                   | How or where can the data/documents be obtained?                                                                                                   | Emails could be sent to the address below to obtain the shared data: <a href="mailto:ja297@cam.ac.uk">ja297@cam.ac.uk</a> |
| 10                  | Any other restrictions?                                                                                                                            | We may balance the potential benefits and risks for each request and then provide the data that could be shared.          |
